# Supplementary material
Source: PubMed Central journal article supplement (PMC7953275)
Supplement: jamaneurol-e204596-s001.pdf [file jamaneurol-e204596-s001.pdf]

## Supplementary Online Content

Bossers SM, Loer SA, Bloemers FW, et al; BRAIN-PROTECT collaborators. Association between prehospital tranexamic acid administration and outcomes of severe traumatic brain injury. *JAMA Neurol*. Published online December 7, 2020. doi:10.1001/jamaneurol.2020.4596

**eFigure.** Patient Flow Diagram

**eTable 1.** Characteristics of Patients Who Died Versus Survived Within 30 Days

**eTable 2.** Characteristics of Patients per Subgroup (Confirmed and Isolated TBI)

**eTable 3.** Results of the Main Analysis: Full Cohort of Patients

**eTable 4.** Results of the Main Analysis: Confirmed Severe TBI

**eTable 5.** Results of the Main Analysis: Isolated Severe TBI

**eTable 6.** Results of Supplemental Sensitivity Analyses

This supplementary material has been provided by the authors to give readers additional information about their work.

**eFigure.** Patient Flow Diagram

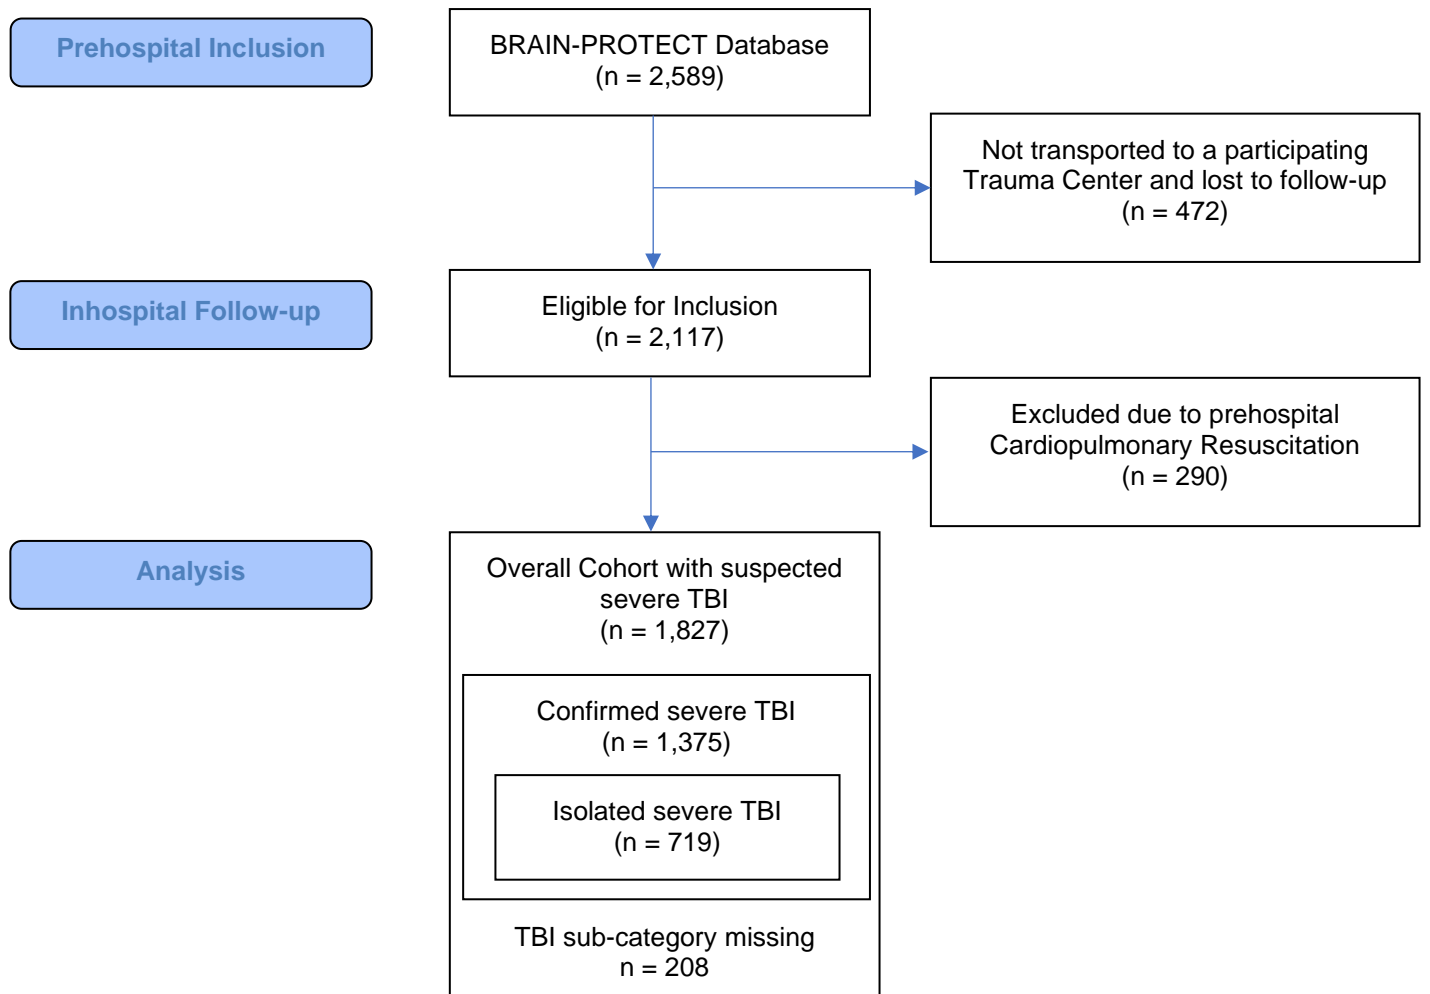

**eTable 1.** Characteristics of Patients Who Died Versus Survived Within 30 Days

|                                                     | Survived<br>(n=1,151) | Died (n=563) | P-value |
|-----------------------------------------------------|-----------------------|--------------|---------|
| <b>Demographic and injury data</b>                  |                       |              |         |
| Age (years)                                         | 35 [20, 55]           | 64 [41, 76]  | < 0.001 |
| Male sex (N (%))                                    | 823 (72%)             | 381 (68%)    | 0.10    |
| <b>Mechanism of Injury (N (%))</b>                  |                       |              |         |
| Motor vehicle accident                              | 222 (20%)             | 72 (13%)     | < 0.001 |
| Motorcycle accident                                 | 133 (12%)             | 30 (5%)      |         |
| Bicycle accident                                    | 255 (22%)             | 124 (22%)    |         |
| Pedestrian accident                                 | 84 (7%)               | 35 (6%)      |         |
| Other traffic accident                              | 43 (4%)               | 7 (1%)       |         |
| Fall from height                                    | 341 (30%)             | 238 (43%)    |         |
| Firearm or stab injury                              | 7 (1%)                | 26 (5%)      |         |
| Other                                               | 51 (4%)               | 20 (4%)      |         |
| Injury Severity Score                               | 25 [16; 34]           | 30 [25; 41]  |         |
| <b>Prehospital vital parameters at HEMS arrival</b> |                       |              |         |
| GCS                                                 | 6 [3, 7]              | 3 [3, 5]     | < 0.001 |
| Systolic blood pressure (mmHg)                      | 139 (32)              | 150 (42)     | < 0.001 |
| Heart rate (min <sup>-1</sup> )                     | 96 (28)               | 89 (30)      | < 0.001 |
| SpO <sub>2</sub> (%)                                | 98 [94, 99]           | 96 [92, 99]  | < 0.001 |
| <b>In-hospital data</b>                             |                       |              |         |
| <b>GOS at discharge (N(%))</b>                      |                       |              |         |
| Death                                               | 20 (2%)               | 552 (98%)    | < 0.001 |
| Vegetative state                                    | 32 (3%)               | 6 (1%)       |         |
| Severe disability                                   | 593 (54%)             | 5 (1%)       |         |
| Moderate disability                                 | 177 (16%)             | 0 (0%)       |         |
| Good recovery                                       | 269 (25%)             | 0 (0%)       |         |
| <b>Primary Exposure</b>                             |                       |              |         |
| Received TXA                                        | 412 (36)              | 241 (43)     | 0.005   |

Prehospital vital parameters represent the first documented values after arrival of Helicopter Emergency Medical Services (HEMS). Numeric variables are presented as mean (SD) or median [quartiles]. Percentages are column-percentages and may not necessarily add up to 100% due to rounding error, and may not necessarily use the total N of the respective column as reported in the top row as the denominator due to missing data (see Table 1 in the manuscript for missing data per variable). \*Hospital length of stay (LOS) was only calculated for patients who were known to survive to discharge. GCS: Glasgow Coma Scale, GOS: Glasgow Outcome Scale, SpO<sub>2</sub>: pulse-oximetric oxygen saturation, TXA: Tranexamic Acid.

**eTable 2.** Characteristics of Patients per Subgroup (Confirmed and Isolated TBI)

|                                                     | Confirmed TBI<br>(n=1,375) | Isolated TBI<br>(n=719) |
|-----------------------------------------------------|----------------------------|-------------------------|
| <b>Demographic and injury data</b>                  |                            |                         |
| Age (years)                                         | 47 [23, 66]                | 53 [27, 68]             |
| Male sex (N (%))                                    | 974 (71%)                  | 478 (66%)               |
| <b>Mechanism of Injury (N (%))</b>                  |                            |                         |
| Motor vehicle accident                              | 215 (16%)                  | 62 (9%)                 |
| Motorcycle accident                                 | 135 (10%)                  | 54 (8%)                 |
| Bicycle accident                                    | 327 (24%)                  | 184 (26%)               |
| Pedestrian accident                                 | 101 (7%)                   | 49 (7%)                 |
| Other traffic accident                              | 39 (3%)                    | 16 (2%)                 |
| Fall from height                                    | 456 (34%)                  | 279 (40%)               |
| Firearm or stab injury                              | 32 (2%)                    | 27 (4%)                 |
| Other                                               | 53 (4%)                    | 35 (5%)                 |
| Injury Severity Score                               | 29 [22, 36]                | 25 [17, 27]             |
| <b>Prehospital vital parameters at HEMS arrival</b> |                            |                         |
| GCS                                                 | 4 [3, 7]                   | 5 [3, 7]                |
| Systolic blood pressure (mmHg)                      | 144 (36)                   | 149 (35)                |
| Heart rate (min <sup>-1</sup> )                     | 93 (29)                    | 88 (28)                 |
| SpO <sub>2</sub> (%)                                | 97 [93, 99]                | 98 [95, 99]             |
| <b>In-hospital data</b>                             |                            |                         |
| Hospital LOS (days)*                                | 19 [9, 34]                 | 14 [6, 25]              |
| <b>GOS at discharge (N(%))</b>                      |                            |                         |
| Death                                               | 521 (39%)                  | 277 (39%)               |
| Vegetative state                                    | 35 (3%)                    | 16 (2%)                 |
| Severe disability                                   | 524 (39%)                  | 236 (34%)               |
| Moderate disability                                 | 130 (10%)                  | 80 (11%)                |
| Good recovery                                       | 126 (10%)                  | 95 (13%)                |
| <b>Primary Exposure</b>                             |                            |                         |
| Received TXA                                        | 539 (39%)                  | 243 (34%)               |
| <b>Primary Outcome</b>                              |                            |                         |
| Death at 30-days                                    | 511 (37%)                  | 274 (38%)               |

Prehospital vital parameters represent the first documented values after arrival of Helicopter Emergency Medical Services (HEMS). Numeric variables are presented as mean (SD) or median [quartiles]. Percentages are column-percentages and may not necessarily add up to 100% due to rounding error, and may not necessarily use the total N of the respective column as reported in the top row as the denominator due to missing data (see Table 1 in the manuscript for missing data per variable). \*Hospital length of stay (LOS) was only calculated for patients who were known to survive to discharge. GCS: Glasgow Coma Scale, GOS: Glasgow Outcome Scale, SpO<sub>2</sub>: pulse-oximetric oxygen saturation, TXA: Tranexamic Acid.

**eTable 3.** Results of the Main Analysis: Full Cohort of Patients

| Independent Variable                   | Odds Ratio (95% Confidence interval) | P-value |
|----------------------------------------|--------------------------------------|---------|
| Prehospital Tranexamic Acid            | 1.18 (0.73; 1.90)                    | 0.51    |
| Anticoagulant Use                      | 0.94 (0.57; 1.56)                    | 0.81    |
| Injury Mechanism <sup>‡</sup>          |                                      | <0.001  |
| Motor vehicle accident                 | Reference                            |         |
| Motorcycle accident                    | 0.61 (0.22; 1.66)                    | 0.34    |
| Bicycle accident                       | 1.27 (0.55; 2.90)                    | 0.58    |
| Pedestrian accident                    | 0.75 (0.22; 2.53)                    | 0.64    |
| Other traffic accident                 | 0.40 (0.10; 1.63)                    | 0.20    |
| Fall from height                       | 1.69 (0.75; 3.81)                    | 0.21    |
| Firearm or stab injury                 | 8.71 (1.12; 67.57)                   | 0.04    |
| Other                                  | 0.89 (0.27; 2.95)                    | 0.86    |
| HEMS Provider anonymized <sup>‡</sup>  |                                      | <0.001  |
| W                                      | Reference                            |         |
| X                                      | 1.20 (0.62; 2.34)                    | 0.59    |
| Y                                      | 1.53 (1.15; 2.02)                    | 0.003   |
| Z                                      | 2.37 (1.85; 3.04)                    | <0.001  |
| Sex (female versus male)               | 1.34 (0.84; 2.15)                    | 0.22    |
| Modified ASA score <sup>‡</sup>        |                                      | <0.001  |
| No systemic disease (ASA 1)            | Reference                            |         |
| Mild systemic disease (ASA 2)          | 1.72 (1.21; 2.43)                    | 0.002   |
| Severe systemic disease (ASA 3-4)      | 2.46 (1.49; 4.06)                    | <0.001  |
| Systolic blood pressure <sup>†</sup>   |                                      | 0.93    |
| Heart rate <sup>†</sup>                |                                      | 0.13    |
| SpO <sub>2</sub> <sup>†</sup>          |                                      | 0.01    |
| Distance to trauma center <sup>†</sup> |                                      | 0.04    |
| ISS <sup>†</sup>                       |                                      | <0.001  |
| ISS-by-time period interaction*        |                                      | 0.02    |
| Time period*                           |                                      | 0.80    |
| GCS <sup>†</sup>                       |                                      | <0.001  |
| Age <sup>†</sup>                       |                                      | <0.001  |

Adjusted odds ratios, 95% confidence intervals and P-values from the main analysis model for the full cohort of patients. ‡For categorical variables with more than two levels, the overall significance is displayed as well as odds ratio estimates and significance versus the reference category. †Non-categorical (numeric) variables were modelled using restricted cubic splines, only the overall significance is displayed as the odds ratio has no directly interpretable meaning. \*Because the version of the Injury Severity Score (ISS) that was used across the Netherlands was changed during the observation period (as of 2015), an interaction term between the ISS and the time period was used to allow the relationship between the ISS and outcomes to vary depending on which version was used. HEMS: Helicopter Emergency Medical Service, ASA: American Society of Anesthesiologists physical status classification system; SpO<sub>2</sub>: pulse-oximetric oxygen saturation, GCS: Glasgow Coma Scale.

**eTable 4.** Results of the Main Analysis: Confirmed Severe TBI

| Independent Variable                   | Odds Ratio (95% Confidence interval) | P-value |
|----------------------------------------|--------------------------------------|---------|
| Prehospital Tranexamic Acid            | 1.27 (0.68; 2.35)                    | 0.45    |
| Anticoagulant Use                      | 0.78 (0.47; 1.29)                    | 0.33    |
| Injury Mechanism <sup>‡</sup>          |                                      | <0.001  |
| Motor vehicle accident                 | Reference                            |         |
| Motorcycle accident                    | 0.55 (0.19; 1.57)                    | 0.26    |
| Bicycle accident                       | 1.11 (0.48; 2.55)                    | 0.81    |
| Pedestrian accident                    | 0.79 (0.25; 2.48)                    | 0.69    |
| Other traffic accident                 | 0.38 (0.09; 1.66)                    | 0.20    |
| Fall from height                       | 1.55 (0.64; 3.75)                    | 0.33    |
| Firearm or stab injury                 | 7.0 (0.87; 56.49)                    | 0.07    |
| Other                                  | 0.81 (0.24; 2.68)                    | 0.73    |
| HEMS Provider anonymized <sup>‡</sup>  |                                      | <0.001  |
| W                                      | Reference                            |         |
| X                                      | 1.12 (0.56; 2.24)                    | 0.76    |
| Y                                      | 1.38 (1.03; 1.86)                    | 0.03    |
| Z                                      | 2.66 (1.86; 3.80)                    | <0.001  |
| Sex (female versus male)               | 1.28 (0.71; 2.29)                    | 0.41    |
| Modified ASA score <sup>‡</sup>        |                                      | <0.001  |
| No systemic disease (ASA 1)            | Reference                            |         |
| Mild systemic disease (ASA 2)          | 2.02 (1.50; 2.73)                    | <0.001  |
| Severe systemic disease (ASA 3-4)      | 3.17 (1.72; 5.84)                    | <0.001  |
| Systolic blood pressure <sup>†</sup>   |                                      | 0.59    |
| Heart rate <sup>†</sup>                |                                      | 0.12    |
| SpO <sub>2</sub> <sup>†</sup>          |                                      | 0.008   |
| Distance to trauma center <sup>†</sup> |                                      | 0.009   |
| ISS <sup>†</sup>                       |                                      | 0.02    |
| ISS-by-time period interaction*        |                                      | <0.001  |
| Time period*                           |                                      | 0.001   |
| GCS <sup>†</sup>                       |                                      | <0.001  |
| Age <sup>†</sup>                       |                                      | <0.001  |

Adjusted odds ratios, 95% confidence intervals and P-values from the main analysis model for patients with confirmed severe TBI. <sup>‡</sup>For categorical variables with more than two levels, the overall significance is displayed as well as odds ratio estimates and significance versus the reference category. <sup>†</sup>Non-categorical (numeric) variables were modelled using restricted cubic splines, only the overall significance is displayed as the odds ratio has no directly interpretable meaning. \*Because the version of the Injury Severity Score (ISS) that was used across the Netherlands was changed during the observation period (as of 2015), an interaction term between the ISS and the time period was used to allow the relationship between the ISS and outcomes to vary depending on which version was used. HEMS: Helicopter Emergency Medical Service, ASA: American Society of Anesthesiologists physical status classification system; SpO<sub>2</sub>: pulse-oximetric oxygen saturation, GCS: Glasgow Coma Scale.

**eTable 5.** Results of the Main Analysis: Isolated Severe TBI

| Independent Variable                   | Odds Ratio (95% Confidence interval) | P-value |
|----------------------------------------|--------------------------------------|---------|
| Prehospital Tranexamic Acid            | 4.49 (1.57; 12.87)                   | 0.005   |
| Anticoagulant Use                      | 0.62 (0.18; 2.18)                    | 0.46    |
| Injury Mechanism <sup>‡</sup>          |                                      | <0.001  |
| Motor vehicle accident                 | Reference                            |         |
| Motorcycle accident                    | 0.85 (0.16; 4.60)                    | 0.85    |
| Bicycle accident                       | 0.93 (0.25; 3.44)                    | 0.91    |
| Pedestrian accident                    | 0.63 (0.19; 2.16)                    | 0.47    |
| Other traffic accident                 | 0.76 (0.23; 2.46)                    | 0.64    |
| Fall from height                       | 2.26 (0.66; 10.40)                   | 0.17    |
| Firearm or stab injury                 | 7.88 (0.63; 97.8)                    | 0.11    |
| Other                                  | 0.90 (0.20; 3.95)                    | 0.89    |
| HEMS Provider anonymized <sup>‡</sup>  |                                      | 0.04    |
| W                                      | Reference                            |         |
| X                                      | 0.80 (0.15; 4.43)                    | 0.80    |
| Y                                      | 0.53 (0.20; 1.35)                    | 0.18    |
| Z                                      | 1.14 (0.66; 1.95)                    | 0.64    |
| Sex (female versus male)               | 0.98 (0.43; 2.24)                    | 0.96    |
| Modified ASA score <sup>‡</sup>        |                                      | 0.002   |
| No systemic disease (ASA 1)            | Reference                            |         |
| Mild systemic disease (ASA 2)          | 1.61 (0.61; 4.28)                    | 0.34    |
| Severe systemic disease (ASA 3-4)      | 2.63 (1.49; 4.67)                    | 0.001   |
| Systolic blood pressure <sup>†</sup>   |                                      | 0.03    |
| Heart rate <sup>†</sup>                |                                      | 0.002   |
| SpO <sub>2</sub> <sup>†</sup>          |                                      | <0.001  |
| Distance to trauma center <sup>†</sup> |                                      | <0.001  |
| ISS <sup>†</sup>                       |                                      | 0.29    |
| ISS-by-time period interaction*        |                                      | 0.23    |
| Time period*                           |                                      | 0.14    |
| GCS <sup>†</sup>                       |                                      | <0.001  |
| Age <sup>†</sup>                       |                                      | <0.001  |

Adjusted odds ratios, 95% confidence intervals and P-values from the main analysis model for patients with isolated severe TBI. <sup>‡</sup>For categorical variables with more than two levels, the overall significance is displayed as well as odds ratio estimates and significance versus the reference category. <sup>†</sup>Non-categorical (numeric) variables were modelled using restricted cubic splines, only the overall significance is displayed as the odds ratio has no directly interpretable meaning. \*Because the version of the Injury Severity Score (ISS) that was used across the Netherlands was changed during the observation period (as of 2015), an interaction term between the ISS and the time period was used to allow the relationship between the ISS and outcomes to vary depending on which version was used. HEMS: Helicopter Emergency Medical Service, ASA: American Society of Anesthesiologists physical status classification system; SpO<sub>2</sub>: pulse-oximetric oxygen saturation, GCS: Glasgow Coma Scale.

## Sensitivity Analyses

Additional sensitivity analyses for the primary outcome were performed *post-hoc* to address several aspects that may have impacted the conclusions based on the main analysis:

1. Given that injury severity and mechanism were accounted for with 3 variables in the main analysis model (as well as 3 variables for vital parameters that are also affected by trauma severity), we had initially not also adjusted for the pupillary response (reacting versus not reacting) or size (dilated versus normal). However, we acknowledge that the pupillary status may be systematically associated with TXA administration and is also a known predictor of mortality. We thus additionally adjust for potential confounding effects of pupillary response (reacting versus not reacting) and size (dilated versus normal), adding these variables to the main analysis model.
2. The main analysis model adjusts for a large number of covariates, with additional spline variables for continuous covariates. This may raise concerns about potential overfitting. While we considered rigorous adjustment for confounding highest priority in the main analysis, we now use a simpler model in the sensitivity analysis which only controls for patient age as well as injury severity (ISS and GCS), which we considered a priori the most important confounders in the dataset.
3. Same as model #2, with pupillary response (reacting versus not reacting) and size (dilated versus normal) added in.
4. Here, we present another simplified model in which the spline variables from the original model were replaced by the original variables, i.e., assuming a linear relationship between the non-categorical variables and the logit of mortality.
5. To address whether differences in TXA dose impacted our results and conclusions, patients who received a dose other than 1g as well as patients <18 years were excluded from the main analysis.
6. In the main analysis, we used a cutoff head-AIS value of  $\geq 3$  to define ‘confirmed’ and ‘isolated’ TBI, as a value of 3 represents serious injury by definition of the AIS scale. To test whether the results are sensitive to the choice of this cutoff value, we now perform a sensitivity analysis in which we use a head-AIS value of  $\geq 4$  (representing more severe injury) as cutoff to define ‘confirmed’ and ‘isolated’ severe TBI.
7. In the main analysis, we had not included the face-AIS in the definition of ‘isolated’ TBI. Head and face injuries commonly co-occur, and we would consider a patient with head and face injury as having an isolated TBI when no relevant extra-cranial injuries are present. Here, we included the face-AIS in the definition and consider patients with relevant face injuries as having non-isolated TBI.
8. To address non-independence of patients within hospitals with a fully specified model rather than focusing on marginal effects and adjusting the standard errors, we re-performed the analysis with the same covariates as the main analysis, now using a generalized linear mixed effects model with a logit link function and a random intercept for hospital.
9. Same as model #1, after multiple imputation (see main manuscript for details).
10. Same as model #2, after multiple imputation.
11. Same as model #3, after multiple imputation.
12. Same as model #4, after multiple imputation.
13. Same as model #5, after multiple imputation.
14. Same as model #6, after multiple imputation.
15. Same as model #7, after multiple imputation.
16. Same as model #8, after multiple imputation (should be viewed as an exploratory analysis, as the analysis of generalized mixed effects models after multiple imputation is not officially supported by Stata)

Results are presented on the next page



**eTable 6.** Results of Supplemental Sensitivity Analyses

| <b>Model</b> | <b>Full Cohort</b> | <b>P-value</b> | <b>Patients with confirmed TBI</b> | <b>P-value</b> | <b>Patients with isolated TBI</b> | <b>P-value</b> |
|--------------|--------------------|----------------|------------------------------------|----------------|-----------------------------------|----------------|
| #1           | 1.45 (0.83; 2.53)  | 0.20           | 1.46 (0.77; 2.75)                  | 0.25           | 5.79 (1.84; 18.22)                | 0.003          |
| #2           | 1.07 (0.87; 1.31)  | 0.55           | 1.10 (0.87; 1.39)                  | 0.43           | 1.60 (1.02; 2.51)                 | 0.04           |
| #3           | 1.13 (0.87; 1.48)  | 0.35           | 1.16 (0.88; 1.52)                  | 0.29           | 1.42 (0.95; 2.14)                 | 0.09           |
| #4           | 1.13 (0.74; 1.74)  | 0.58           | 1.18 (0.77; 1.79)                  | 0.45           | 2.90 (1.09; 7.71)                 | 0.03           |
| #5           | 1.23 (0.57; 2.65)  | 0.59           | 1.29 (0.51; 3.22)                  | 0.59           | 4.35 (1.20; 15.82)                | 0.03           |
| #6           | 1.18 (0.73; 1.90)  | 0.51           | 1.29 (0.56; 2.98)                  | 0.55           | 4.21 (1.38; 12.82)                | 0.01           |
| #7           | 1.18 (0.73; 1.90)  | 0.51           | 1.27 (0.68; 2.35)                  | 0.45           | 4.72 (1.88; 11.88)                | 0.001          |
| #8           | 1.18 (0.65; 2.13)  | 0.59           | 1.27 (0.69; 2.33)                  | 0.45           | 4.49 (1.66; 12.15)                | 0.003          |
| #9           | 1.05 (0.81; 1.36)  | 0.72           | 1.10 (0.90; 1.34)                  | 0.34           | 1.90 (1.17; 3.11)                 | 0.01           |
| #10          | 1.05 (0.80; 1.38)  | 0.71           | 1.10 (0.87; 1.38)                  | 0.44           | 1.60 (1.02; 2.51)                 | 0.04           |
| #11          | 1.00 (0.80; 1.26)  | 0.97           | 1.08 (0.91; 1.29)                  | 0.39           | 1.57 (1.02; 2.41)                 | 0.04           |
| #12          | 1.00 (0.71; 1.41)  | 0.99           | 1.07 (0.77; 1.49)                  | 0.69           | 2.01 (1.02; 3.96)                 | 0.04           |
| #13          | 1.06 (0.70; 1.60)  | 0.78           | 1.04 (0.72; 1.49)                  | 0.84           | 1.99 (1.13; 3.50)                 | 0.02           |
| #14          | 1.17 (0.84; 1.65)  | 0.35           | 1.23 (0.87; 1.76)                  | 0.25           | 2.44 (1.49; 4.00)                 | <0.001         |
| #15          | 1.17 (0.84; 1.65)  | 0.35           | 1.20 (0.92; 1.55)                  | 0.18           | 2.21 (1.41; 3.45)                 | 0.001          |
| #16          | 1.17 (0.84; 1.64)  | 0.36           | 1.19 (0.83; 1.69)                  | 0.34           | 2.05 (1.17; 3.59)                 | 0.01           |

For a detailed description of each model, please refer to the previous page. Results are reported as odds ratios and their 95% confidence interval.
