# Supplementary material
Source: PubMed Central journal article supplement (PMC7953275)
Supplement: jamaneurol-e204596-s002.pdf [file jamaneurol-e204596-s002.pdf]

## Supplemental Online Content: Nonauthor Collaborators

\*Indicates required information. Only first name, last name, and suffix will appear in PubMed.

| <b>Group Name: BRAIN-PROTECT Collaborators</b> |              |         |                  |                                    |                                          |                                                         |                                  |
|------------------------------------------------|--------------|---------|------------------|------------------------------------|------------------------------------------|---------------------------------------------------------|----------------------------------|
| First Name, Middle Initial*                    | Last Name*   | Suffix* | Academic Degrees | Institution                        | Location (city, state/province, country) | Role or Contribution, eg, chair, principal investigator | Subgroup, eg, Steering Committee |
| Anne                                           | de Boer      |         | MSc.             | SpoedZorgNet                       | Amsterdam, the Netherlands               | Site facilitation                                       |                                  |
| Johannes C.                                    | Goslings     |         | MD, PhD          | OLVG                               | Amsterdam, the Netherlands               | Site facilitation                                       |                                  |
| Sven H.                                        | van Helden   |         | MD, PhD          | Isala                              | Zwolle, the Netherlands                  | Site facilitation                                       |                                  |
| Danique                                        | Hesselink    |         | MSc.             | Netwerk Acute Zorg Zwolle          | Zwolle, the Netherlands                  | Site facilitation                                       |                                  |
| Gijs                                           | van Aken     |         |                  | Netwerk Acute Zorg Zwolle          | Zwolle, the Netherlands                  | Site facilitation                                       |                                  |
| Albertus                                       | Beishuizen   |         | MD, PhD          | Medisch Spectrum Twente            | Enschede, the Netherlands                | Site facilitation                                       |                                  |
| Rolf E.                                        | Egberink     |         | MSc.             | Acute Zorg Euregio                 | Enschede, the Netherlands                | Site facilitation                                       |                                  |
| Nancy                                          | ter Bogt     |         | PhD              | Acute Zorg Euregio                 | Enschede, the Netherlands                | Site facilitation                                       |                                  |
| Mariska A.C.                                   | de Jongh     |         | PhD              | Netwerk Acute Zorg Brabant         | Tilburg, the Netherlands                 | Site facilitation                                       |                                  |
| Koen                                           | Lansink      |         | MD, PhD          | Elisabeth-TweeSteden ziekenhuis    | Tilburg, the Netherlands                 | Site facilitation                                       |                                  |
| Gerwin                                         | Roks         |         | MD, PhD          | Elisabeth-TweeSteden ziekenhuis    | Tilburg, the Netherlands                 | Site facilitation                                       |                                  |
| Pieter                                         | Joose        |         | MD, PhD          | Noordwest Ziekenhuisgroep          | Alkmaar, the Netherlands                 | Site facilitation                                       |                                  |
| Kees J.                                        | Ponsen       |         | MD, PhD          | Noordwest Ziekenhuisgroep          | Alkmaar, the Netherlands                 | Site facilitation                                       |                                  |
| Lukas L.                                       | van Spengler |         | MSc.             | Traumazorgnetwerk Midden-Nederland | Utrecht, the Netherlands                 | Site facilitation                                       |                                  |
| Stasja                                         | Aspers       |         |                  | Traumazorgnetwerk Midden-Nederland | Utrecht, the Netherlands                 | Site facilitation                                       |                                  |

## Supplemental Online Content: Nonauthor Collaborators

\*Indicates required information. Only first name, last name, and suffix will appear in PubMed.

| First Name, Middle Initial* | Last Name*     | Suffix* | Academic Degrees | Institution                       | Location (city, state/province, country) | Role or Contribution, eg, chair, principal investigator | Subgroup, eg, Steering Committee |
|-----------------------------|----------------|---------|------------------|-----------------------------------|------------------------------------------|---------------------------------------------------------|----------------------------------|
| Annelies                    | Toor           |         | MSc.             | Netwerk Acute Zorg Noordwest      | Amsterdam, the Netherlands               | Site facilitation                                       |                                  |
| Robert J.                   | Houmes         |         | MD, PhD          | Erasmus MC                        | Rotterdam, the Netherlands               | Site facilitation                                       |                                  |
| Jan                         | van Ditshuizen |         | MSc.             | Traumacentrum Zuidwest-Nederland  | Rotterdam, the Netherlands               | Site facilitation                                       |                                  |
| Tea                         | van Voorden    |         | MSc.             | Traumacentrum Zuidwest-Nederland  | Rotterdam, the Netherlands               | Site facilitation                                       |                                  |
| Michael J.R.                | Edwards        |         | MD, PhD          | Radboudumc                        | Nijmegen, the Netherlands                | Site facilitation                                       |                                  |
| Bert                        | Dercksen       |         | MD               | UMCG                              | Groningen, the Netherlands               | Site facilitation                                       |                                  |
| Rob                         | Spanjersberg   |         |                  | UMCG                              | Groningen, the Netherlands               | Site facilitation                                       |                                  |
| Lieneke F.                  | Venema         |         | MD               | UMCG                              | Groningen, the Netherlands               | Site facilitation                                       |                                  |
| Ellen                       | Weelink        |         | MD               | UMCG                              | Groningen, the Netherlands               | Site facilitation                                       |                                  |
| Inge H.F.                   | Reininga       |         | PhD              | Acute Zorgnetwerk Noord Nederland | Groningen, the Netherlands               | Site facilitation                                       |                                  |
| Gerard                      | Innemeer       |         | MD, PhD          | RAV Gooi & Vechtstreek            | Hilversum, the Netherlands               | Study design                                            | Steering Committee member        |
| Matthijs                    | de Visser      |         | MSc.             | RAV Hollands Midden               | Leiden, the Netherlands                  | Study design                                            | Steering Committee member        |
| Marcel A.                   | de Leeuw       |         | MD, PhD          | AUMC & Lifeliner 1                | Amsterdam, the Netherlands               | Study design, Site facilitation                         |                                  |
